# Supplementary material
Source: MDPI journal article supplement (https://www.mdpi.com/2073-445X/7/4/140)
Supplement: s1 [file s1]

# Resilience of Traditional Livelihood Approaches Despite Forest Grabbing: Ogiek to the West of Mau Forest, Uasin Gishu County

Jemaiyo Chabeda-Barthe and Tobias Haller

This supplementary material supports the main text as follows:

**Table S1.** Ogiek Families Settled in 1996/1997 after the Land Clashes of 1992.

| Name /Scheme      | Scheme area in ha | Intended beneficiaries                                                        | No. of beneficiaries                           | Remarks                                                                                                   |
|-------------------|-------------------|-------------------------------------------------------------------------------|------------------------------------------------|-----------------------------------------------------------------------------------------------------------|
| Tinet             | 12,132            | Ogiek families                                                                | 5,016                                          | Parcel demarcated, survey and allotment letters issued by 1996                                            |
| Ndoinet           | 4,565             | Ogiek families                                                                | 1,800                                          | Already settled by 1996                                                                                   |
| Saino             | 5600              | Ogiek families                                                                | 1800                                           | Settled when surveyed in 1996                                                                             |
| Kiptagich         | 1812              | Ogiek families                                                                | 600                                            | Established in 1997                                                                                       |
| Sururu            | 5882              | Ogiek families                                                                | 2600                                           | 1 <sup>st</sup> Ogiek settlement in the Mau Forest in 1994                                                |
| Likia             | 2290              | Ogiek families                                                                | 900                                            | Started in 1995                                                                                           |
| Teret             | 2117              | Ogiek families                                                                | 8500                                           | Established in 1995                                                                                       |
| Sigotik           | 1,812             | Not stated                                                                    | 600 against 1500 families demanding settlement | Started in 1994, not finalized due to disputes                                                            |
| Nessuit           | 4730              | Not stated                                                                    | 1500 families                                  | Families already residing                                                                                 |
| Ngongongeri       | 4100              | Not stated                                                                    | 1400                                           | Started in 1996                                                                                           |
| Marioshoni        | 8300              | Ogiek families                                                                | 1500 families                                  | Started in 1996 but put to hold through court injunction                                                  |
| Kapsita *elburgon | 3300              | Chepkundi victims of land clashes of 1997                                     | 900 families                                   | Established in 1997. Beneficiaries surrendered their titles in Chepakundi in exchange for land in Kapsita |
| Baraget           | 2800              | Laare/Kiambogo victims of land clashes in 1997                                | 700 families                                   | Part of it is an exotic plantation and the other part is not stated where it is                           |
| Kapsita(Molo)     | 901.6             | Chepakundi victims survivors of clashes                                       | 671                                            | Established in 1998 after spillover from Kapsita elburgon clashes                                         |
| Kibunja           | 125               | Displaced people by expansion of Mary Mount school and Kibunja trading centre | Not stated                                     | Established in 1995                                                                                       |
| Cheboror          | 788.3             |                                                                               | Not stated                                     | Set up in 1995 to settle unknown number of dorobo community living in Cengalo area.                       |

Source, 2009 Report of the Prime Ministers Taskforce on the Conservation of the Mau Forest complex.
